# Supplementary material for: Identification of Small Molecules that Disrupt Signaling between ABL and Its Positive Regulator RIN1
Source: PubMed Central journal article supplement (PMC4374917; doi:10.1371/journal.pone.0121833), 2015-03-26

**S2 Figure. The five lead compounds decrease K562 proliferation in a dose-dependent manner.**

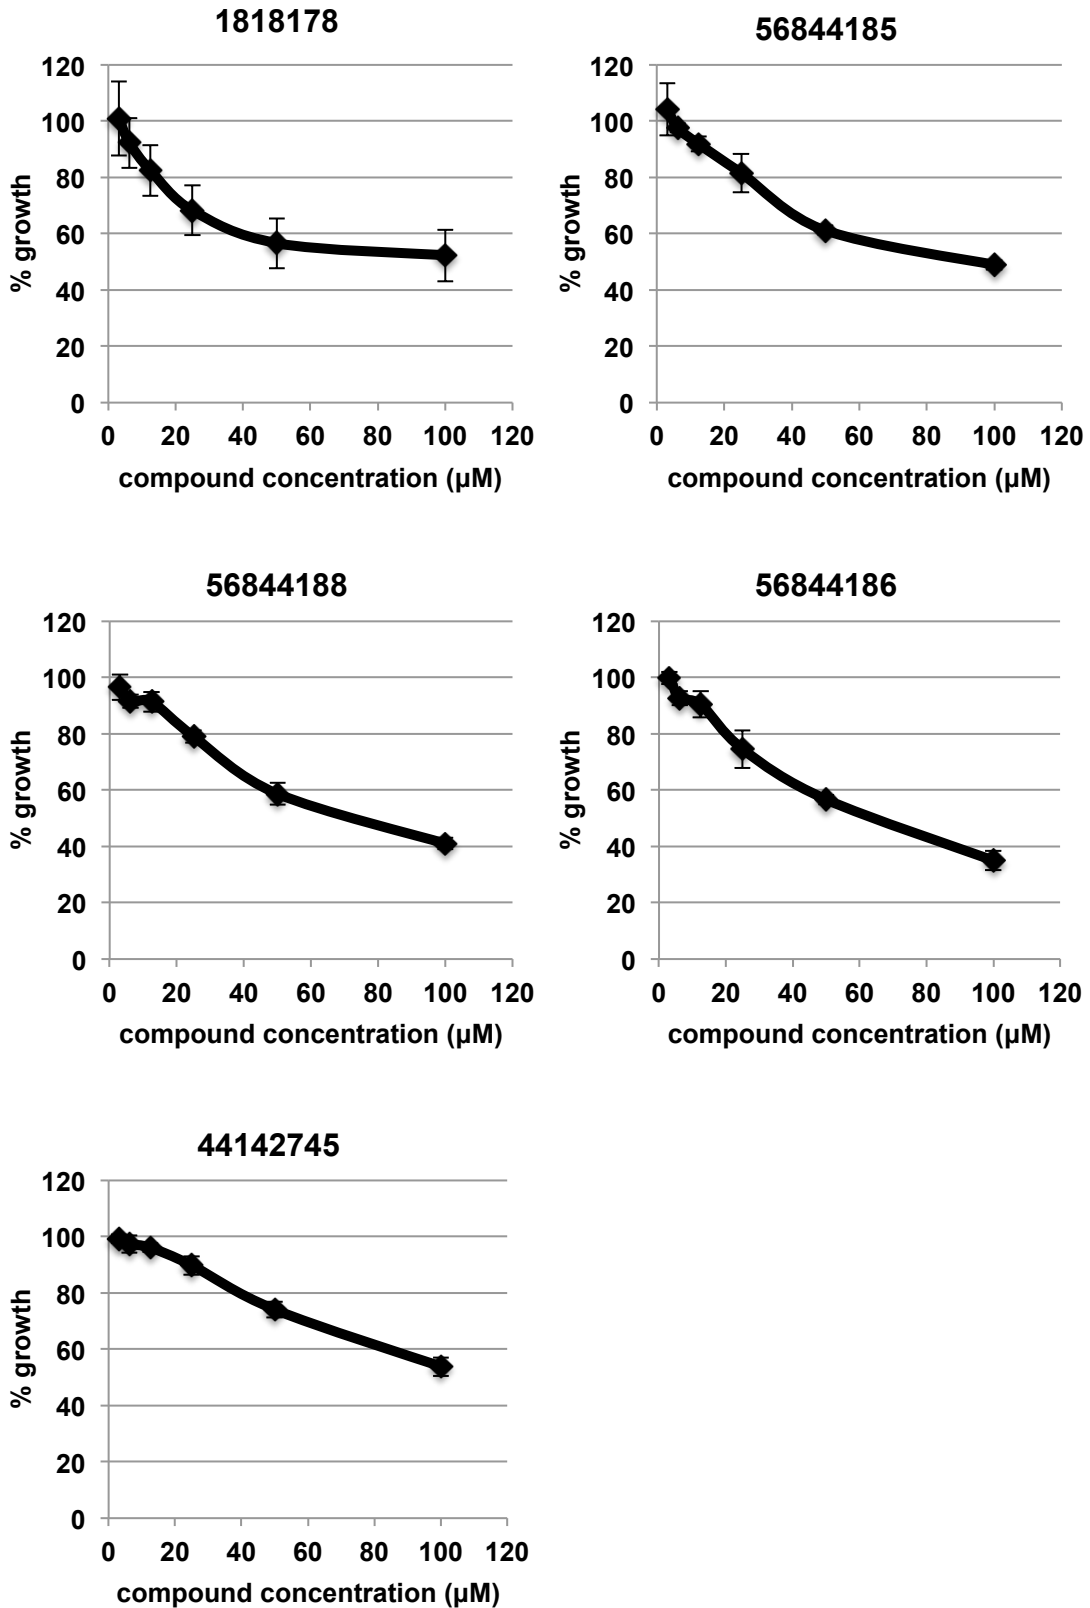

Supplement: pone.0121833.s002.pdf [file pone.0121833.s002.pdf]
