# Supplementary material for: Identification of Small Molecules that Disrupt Signaling between ABL and Its Positive Regulator RIN1
Source: PubMed Central journal article supplement (PMC4374917; doi:10.1371/journal.pone.0121833), 2015-03-26
Supplement: pone.0121833.s003.pdf [file pone.0121833.s003.pdf]

**S3 Figure. CID 1532134 is structurally similar to known allosteric BCR-ABL kinase inhibitors GNF-1 and GNF-2.**

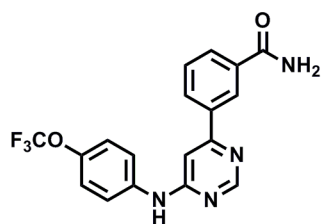

**GNF-2**

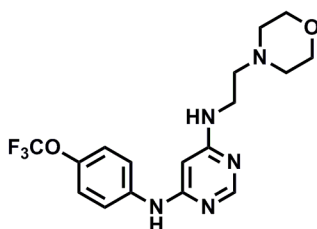

**GNF-1**

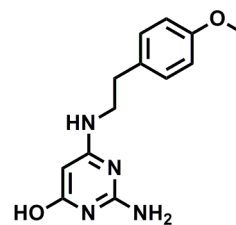

**CID 1532134**
