# Supplementary material for: Identification of Small Molecules that Disrupt Signaling between ABL and Its Positive Regulator RIN1
Source: PubMed Central journal article supplement (PMC4374917; doi:10.1371/journal.pone.0121833), 2015-03-26

**S4 Figure. Acyl piperidine carboxamide structure-activity relationship.**

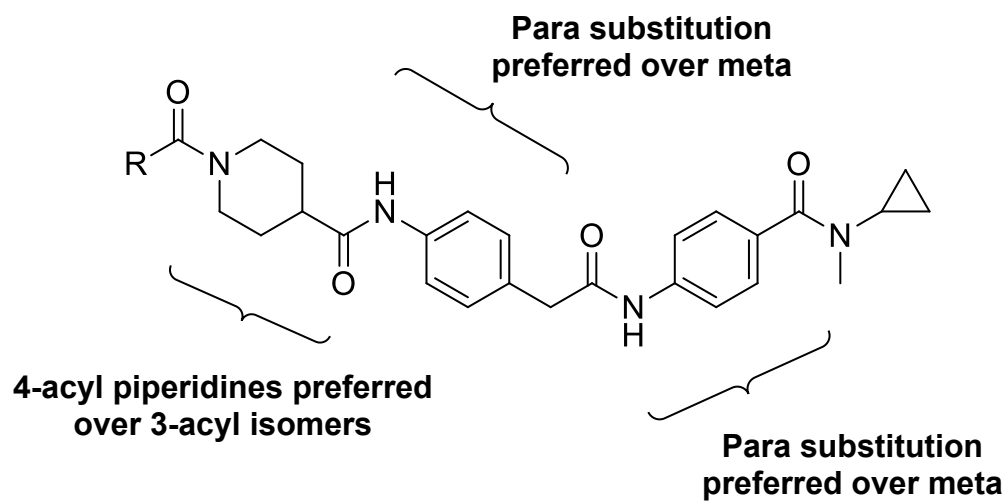

Supplement: pone.0121833.s004.pdf [file pone.0121833.s004.pdf]
