# Supplementary material for: Identification of Small Molecules that Disrupt Signaling between ABL and Its Positive Regulator RIN1
Source: PubMed Central journal article supplement (PMC4374917; doi:10.1371/journal.pone.0121833), 2015-03-26
Supplement: pone.0121833.s005.pdf [file pone.0121833.s005.pdf]

## S5 Figure. ABL-eGFP and RIN1-TAP protein sequences.

### ABL<sup>1531</sup>-GFP MW aprox. 88 kDa

MGQQPGKVLGDQRRPSLPALHFIKAGGKKESSRHGGPHCNVFEHEALQRPVASFDFE  
PQGLSEAARWNSKENLLAGPSENDPNLFVALYDFVASGDNTLSITKGEKLRVLGYNHNG  
EWCEAQTKNGQGWPVSNYITPVNSLEKHSWYHGPVSRNAAEYLLSSGINGSFLVRESE  
SSPGQRSISLRYEGRVYHYRINTASDGKLYVSSESFRNTLAELVHHHSTVADGLITTLHYP  
APKRNKPTVYGVSPNYDKWEMERTDITMKHKLGGGQYGEVYEGVWKKYSLTVAVKTLK  
EDTMEVEEFLKEAAMKEIKHPNLVQLLGVCTREPPFYIITEFMTYGNLLDYLRECNRQE  
VNAVLLYMATQISSAMEYLEKKNFIHRDLAARNCLVGENHLVKVADFGLSRLMTGDTYT  
AHAGAKFPIKWTAPELAYNKFSIKSDVWAFGVLLWEIATYGMSPYPGIDLSQVYELLEK  
DYRMERPEGCPEKVEYELMRACWQWNPDRPSFAEIQAFETMFQESSISDEVEKELG  
KMSKGEELFTGVVPIVLDGDVNGHKFSVSGEGEGDATYGKLTCLKICTTGKLPVWPW  
TLVTTLTYGVQCFSRYPDHMKQHDFKFSAMPEGYVQERTIFFKDDGNYKTRAEVKFEG  
DTLVNRIELKGDIFKEDGNILGHKLEYNYNSHNVYIMADKQKNGIKVNFKIRHNIEDGSVQ  
LADHYQQNTPIGDGPVLLPDNHYLSTQSALSKDPNEKRDHMLLEFVTAAGITHGMDEL  
YK<sup>HHHHHH</sup>

### RIN1-TAP

MESPGESGAGSPGAPSPSSFTTGHLAREKPAQDPLYDVPNASGGQAGGPQRPRGVV  
SLRERLLLTRPVWLQLQANAAAALHMLRTEPPGTFLVRKSNTTRQCQALCMRLPEASG  
PSFVSSHYILESPGGVSLEGSELMFPDLVQLICAYCHTRDILLPLQLPRAIHHAATHKE  
LEAISHLGIEFWSSSLNIKAQRGPAGGPVLPQLKARSPQELDQGTGAALCFFNPLFPG  
DLGPTKREKFKRSFKVRVSTETSSPLSPPAVPPPPVPLPGAVPSQTERLPPCQLRR  
ESSVGYRVPAGSGPSLPPMPSLQEVDCGSPSSSEEEGVPGSRGSPATSPHLGRRRPL  
LRMSAAFCSSLAPERQVGRAAAALMQRHTAAGQLVQDLLTQVRDQGRPQEELEGIR  
QALSRARAMLSAELGPEKLVSPKRLEHVLEKSLHCSVLKPLRPILAAARLRRRLAADGS  
LGRLAEGLRLARAQGPAGFAGSHLSLSPVELEQVRQKLLQLVRTYSPSAQVKRLLQA  
CKLLYMALRTQEGEGSGADGFLPLLSLVLAHCDLPELLLEAEYMSELLEPSLLTGEGG  
YYLTSLSASLALLSGLGQAHTLPLSPVQELRRSLSLWEQRRLPATHCFQHLLRVAYQD  
PSSGCTSKTLAVPPEASIALTNQLCATKFRVTQPNTFGLFLYKEQGYHRLPPGALAHRL  
PTTGYLVIYRRAEWPETQGAVTEEEGSGQSEARSRGEEQGCQGDGAGVKASPRDIR  
EQSETTAEGGQQAQEGPAQPEPEAEGSRAAEESRMDEKTTGWRGGHVVEGLAG  
ELEQLRARLEHHPQGGQREPSGGCKLGLLVPRGSASENLYFQGELKTAALAQHDEAVDN  
KFNKEQQNAFYEILHLPNLNEEQRNAFIQSLKDDPSQSANLLAEAKKLNDAAQAPKVDNK  
FNKEQQNAFYEILHLPNLNEEQRNAFIQSLKDDPSQSANLLAEAKKLNGAQAPKVDANS  
AGKSTQLDYKDDDDK

EGFP

SBP

QG = TEV cleavage

ProtA

FLAG epitope tag
